# Supplementary material for: Unmet Psychosocial Needs of Patients with Newly Diagnosed Ulcerative Colitis: Results from the Nationwide Prospective Cohort Study in Korea
Source: PubMed Central journal article supplement — Gut Liver. 2019 Sep 20;14(4):459–67. doi: 10.5009/gnl19107 (PMC7366148; doi:10.5009/gnl19107), 2019-09-20
Supplement: GNL-14-459_Supple.pdf [file GNL-14-459_Supple.pdf]

**Supplementary Table 1.** Multiple Linear Regression Analysis to Identify Factors Associated with General Health-Related Quality of Life

SF 12

| Variable                     | PF      |         | RP      |         | BP      |         | GH      |         | VT      |         | SF      |         | RE      |         | MH      |         |
|------------------------------|---------|---------|---------|---------|---------|---------|---------|---------|---------|---------|---------|---------|---------|---------|---------|---------|
|                              | $\beta$ | p-value |
| HADS-D $\geq 11$             | -17.9   | <0.001  | -15.3   | <0.001  | -18.1   | <0.001  | -10.8   | 0.010   | -19.2   | <0.001  | -21.7   | <0.001  | -16.2   | <0.001  | -13.5   | <0.001  |
| HADS-A $\geq 11$             | -17.1   | 0.003   | -20.5   | <0.001  | -25.3   | <0.001  | -10.6   | 0.021   | -21.9   | <0.001  | -26.5   | <0.001  | -25.4   | <0.001  | -27.2   | <0.001  |
| Hemoglobin, g/dL             | 1.8     | 0.082   | -       | -       | -       | -       | 1.5     | 0.065   | -       | -       | -       | -       | 2.1     | 0.025   | -       | -       |
| ESR, mm/hr                   | -0.2    | 0.074   | -       | -       | -       | -       | -       | -       | -0.2    | 0.007   | -0.2    | 0.015   | -       | -       | -       | -       |
| CRP, mg/dL                   | -0.5    | 0.058   | -       | -       | -0.3    | 0.157   | -       | -       | -       | -       | -       | -       | -       | -       | -       | -       |
| Albumin, g/dL                | -       | -       | 9.9     | 0.002   | 4.3     | 0.164   | -       | -       | -       | -       | 7.0     | 0.019   | -       | -       | -       | -       |
| WBC, $10^3/\mu\text{L}$      | -       | -       | -       | -       | -       | -       | -       | -       | -       | -       | -       | -       | -       | -       | -       | -       |
| Disease severity*            | -2.4    | 0.061   | -       | -       | -2.7    | 0.018   | -1.5    | 0.162   | -3.0    | 0.006   | -3.6    | 0.002   | -       | -       | -2.5    | 0.001   |
| Disease extent <sup>†</sup>  | -       | -       | -       | -       | -       | -       | -       | -       | -       | -       | -       | -       | -       | -       | -       | -       |
| Left-sided                   | -       | -       | -6.3    | 0.300   | -0.4    | 0.949   | -       | -       | -       | -       | -       | -       | -7.1    | 0.265   | -       | -       |
| Extensive                    | -       | -       | -16.4   | 0.010   | -12.6   | 0.029   | -       | -       | -       | -       | -       | -       | -15.6   | 0.016   | -       | -       |
| Symptoms <sup>‡</sup>        | -       | -       | 0.1     | 0.064   | -       | -       | -       | -       | -       | -       | -       | -       | -       | -       | -       | -       |
| Comorbidity <sup>§</sup>     | -8.1    | 0.026   | -       | -       | -       | -       | -4.4    | 0.135   | -       | -       | -       | -       | -       | -       | -       | -       |
| Alcohol: current             | 9.7     | 0.040   | -       | -       | -       | -       | -       | -       | -       | -       | -       | -       | -       | -       | -       | -       |
| BMI, <18.5 kg/m <sup>2</sup> | -       | -       | -13.0   | 0.017   | -       | -       | -       | -       | -       | -       | -15.8   | 0.002   | -       | -       | -       | -       |

SF 12, 12-Item Short Form; PF, physical functioning; RP, role-physical; BP, body pain; GH, general health; VT, vitality; SF, social functioning; RE, role-emotional; MH, mental health; HADS-D, Hospital Anxiety and Depression Scale-Depression; HADS-A, HADS-Anxiety; ESR, erythrocyte sedimentation rate; CRP, C-reactive protein; WBC, white blood cell; BMI, body mass index.

\*Severity measured by the Mayo score; <sup>†</sup>Extent measured by Montreal classification; <sup>‡</sup>Time between the first development of disease-related symptoms and ulcerative colitis diagnosis; <sup>§</sup>Charlson's comorbidity index. Reference variables: HADS-D/A (<11), disease severity (moderate); disease extent (E1); disease severity by endoscopy (moderate); alcohol (no).
